# Supplementary material for: Molecular dynamic simulations of the tubulin–human gamma synuclein complex: structural insight into the regulatory mechanism involved in inducing resistance against Taxol
Source: Royal Society of Chemistry journal article supplement (doi:10.1039/c3mb25427e), 2013-03-07
Supplement: c3mb25427e.pdf [file c3mb25427e.pdf]

### Electronic Supplementary information

#### Figure S-1: Elucidates the changes in $\alpha\beta$ Tub- $\gamma$ Syn complex during the molecular dynamic studies.

Changes observed in interface occurred due to the intertwining of helix N in  $\gamma$ Syn with tail region of  $\beta$ Tub was deciphered. As the intertwining occurred, hydrogen bond was formed between the residues K45 in loop L of Syn and R757 of H9-S8 Loop in  $\beta$ Tub. The figure also displays hydrogen bonds formed between residues S9, T22, V26, E28 and V37 in helix N of  $\gamma$ Syn with D894, D882, Q884, T880 and N867 in tail region of  $\beta$ Tub.

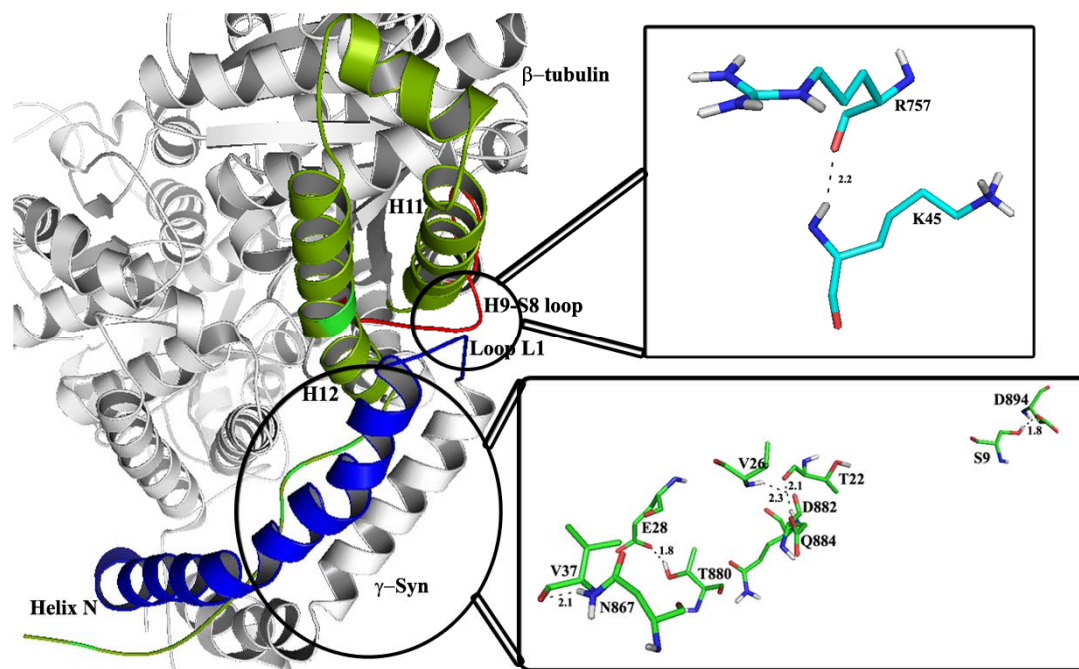

**Figure S-2: Deciphers the Interactions observed in the native  $\alpha\beta$ Tub- $\gamma$ Syn complex:**

S-32A Shows the presence of hydrogen bonds observed between P694 and Q696 of T7 and D896 of S-Loop in native form of  $\beta$ Tub, while S-2B shows hydrogen bonds observed between H9-S8 Loop [M751 and N749] with H6 [D654 and T665] and S7 [P719 and F721].

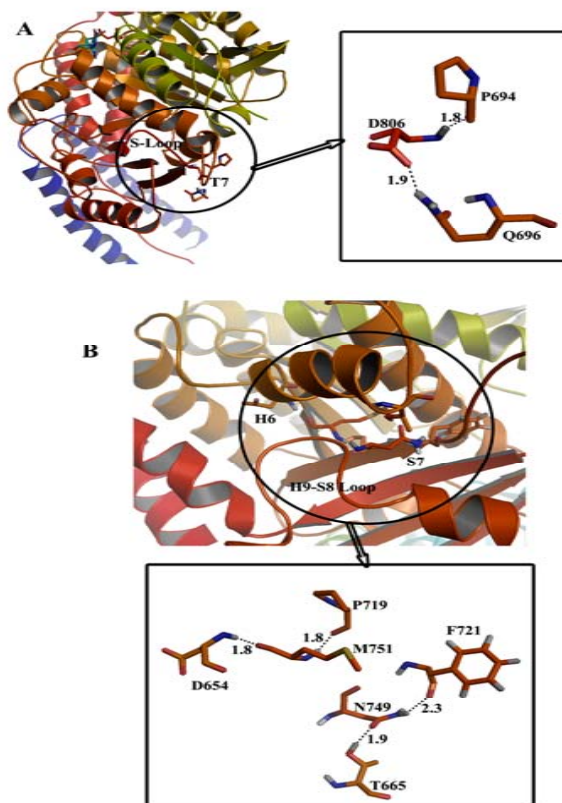

**Table S-1: Details regarding the interface properties of  $\gamma$ Syn - $\alpha$ Tub complex:**

Details of interface residues and their accessible surface area [ASA], buried surface area [BSA] and their free energy of solvation observed in the complex of  $\gamma$ Syn associated with  $\alpha\beta$ Tub.  $\gamma$ Syn is represented by Chain A and  $\alpha$ Tub by Chain B.

| Residues Chain A |        |       |            | Residues Chain B |        |        |            |
|------------------|--------|-------|------------|------------------|--------|--------|------------|
| Residue          | ASA    | BSA   | $\Delta G$ | Residue          | ASA    | BSA    | $\Delta G$ |
| A85              | 52.19  | 28.64 | 0.41       | V 440            | 118.21 | 50.68  | 0.81       |
| E86              | 120.29 | 11.01 | 0.17       | E443             | 165.55 | 5.02   | 0.08       |
| A89              | 61.64  | 39.34 | 0.57       | G444             | 82.05  | 49.01  | -<br>0.23  |
| V90              | 93.07  | 41.11 | 0.59       | E445             | 157.13 | 39.00  | 0.25       |
| G93              | 59.12  | 37.63 | -<br>0.01  | E446             | 165.57 | 150.36 | -<br>0.40  |
| V94              | 95.97  | 10.73 | 0.09       | E447             | 164.58 | 7.12   | -<br>0.08  |
| V95              | 94.31  | 66.06 | 0.92       | G448             | 66.13  | 42.14  | 0.36       |
| R96              | 249.63 | 90.25 | -<br>0.19  | E449             | 171.48 | 96.09  | -<br>0.73  |
| K97              | 68.60  | 16.70 | -<br>0.09  | E450             | 155.69 | 92.92  | -<br>0.11  |
| E98              | 138.10 | 45.10 | 0.53       | Y451             | 281.25 | 100.01 | 0.85       |
| D99              | 147.79 | 12.03 | 0.04       |                  |        |        |            |
| Q106             | 119.16 | 22.39 | 0.02       |                  |        |        |            |
| E108             | 70.75  | 2.48  | -<br>0.00  |                  |        |        |            |
| S124             | 101.55 | 1.23  | -<br>0.01  |                  |        |        |            |
| G125             | 43.33  | 40.04 | 0.45       |                  |        |        |            |
| G126             | 54.38  | 33.94 | 0.25       |                  |        |        |            |
| D127             | 156.22 | 42.23 | -<br>0.04  |                  |        |        |            |

**Table S-2: Elucidates the interface properties of  $\gamma$ Syn - $\beta$ Tub complex:**

Here, the interface residues, accessible surface area [ASA], buried surface area [BSA] and their free energy of solvation observed in the complex of  $\gamma$ Syn - $\beta$ Tub is presented.  $\gamma$ Syn is represented by Chain A, and  $\beta$ Tub is represented by Chain C.

| Residues Chain A |        |       |            | Residues Chain C |        |       |            |
|------------------|--------|-------|------------|------------------|--------|-------|------------|
| Residue          | ASA    | BSA   | $\Delta G$ | Residue          | ASA    | BSA   | $\Delta G$ |
| G36              | 59.88  | 16.45 | -0.17      | D755             | 40.61  | 10.17 | -0.07      |
| V37              | 127.74 | 15.06 | 0.24       | R757             | 158.54 | 20.65 | -0.14      |
| Y39              | 215.68 | 62.69 | -0.01      | H758             | 112.03 | 38.41 | -0.04      |
| K45              | 164.16 | 99.20 | -0.34      | G759             | 2.70   | 0.50  | 0.01       |
| V48              | 96.64  | 54.41 | 0.83       | R760             | 70.81  | 63.44 | 0.00       |
| V49              | 94.80  | 29.36 | 0.47       | S790             | 90.56  | 23.33 | 0.25       |
| S51              | 53.66  | 4.84  | 0.07       | E794             | 93.83  | 8.02  | 0.06       |
| V52              | 94.30  | 55.75 | 0.89       | K830             | 70.48  | 27.77 | 0.39       |
| V55              | 95.68  | 30.04 | 0.48       | R831             | 166.59 | 1.84  | 0.03       |
| T59              | 54.88  | 14.27 | 0.12       | E834             | 106.37 | 20.36 | -0.00      |
| Q62              | 132.61 | 95.83 | -0.02      | N867             | 120.33 | 16.14 | -0.00      |
| A63              | 48.90  | 28.32 | 0.42       | Q874             | 74.47  | 16.32 | 0.00       |
| V66              | 88.68  | 50.28 | 0.80       | Q877             | 55.26  | 16.16 | 0.01       |
| S67              | 51.12  | 11.66 | -0.06      | D878             | 76.24  | 5.61  | -0.02      |
| V70              | 85.06  | 50.82 | 0.81       | A879             | 62.32  | 43.71 | 0.25       |
| S73              | 63.12  | 30.33 | 0.26       | A881             | 69.80  | 18.19 | 0.27       |

|     |        |       |       |      |        |        |       |
|-----|--------|-------|-------|------|--------|--------|-------|
| T76 | 77.03  | 16.70 | 0.27  | E883 | 115.82 | 25.29  | -0.11 |
| V77 | 92.51  | 27.90 | 0.44  | Q884 | 173.76 | 21.40  | -0.10 |
| K80 | 138.98 | 57.87 | -0.35 | G885 | 68.02  | 44.87  | 0.02  |
|     |        |       |       | E886 | 149.28 | 80.74  | 0.35  |
|     |        |       |       | F887 | 183.23 | 45.04  | 0.23  |
|     |        |       |       | E888 | 138.20 | 12.53  | 0.20  |
|     |        |       |       | E889 | 108.74 | 34.08  | 0.49  |
|     |        |       |       | E893 | 168.72 | 100.93 | -0.02 |
|     |        |       |       | D894 | 141.01 | 23.00  | -0.17 |
|     |        |       |       | E895 | 160.76 | 1.11   | 0.02  |
|     |        |       |       | A896 | 168.62 | 9.72   | 0.10  |

**Table S-3: *In silico* alanine scanning mutagenesis on  $\gamma$ Syn- $\alpha\beta$ Tub complex**

Results of *in silico* alanine scanning mutagenesis to identify potential hot spot residues involved in harboring interactions between  $\gamma$ Syn- $\alpha\beta$ Tub. Residues with  $\Delta\Delta G_{\text{bind}}$  values that are equal to or more than 1 kcal/mol are considered to be the hot spot residues.

Chain A indicates  $\gamma$ Syn, Chain B –  $\alpha$ Tub and Chain C –  $\beta$ Tub. Column 3, *int* indicates the measure of whether the residue is buried (0) or in direct contact with the partner (1).

| pdb# | chain | int | $\Delta\Delta G$ (bind) | $\Delta\Delta G$ (complex,obs) | $\Delta G$ (partner) |
|------|-------|-----|-------------------------|--------------------------------|----------------------|
| 37   | A     | 0   | 0.02                    | 0.00                           | 0.15                 |
| 39   | A     | 1   | 0.48                    | 0.00                           | -1.03                |
| 45   | A     | 1   | 2.35                    | 0.00                           | -0.70                |
| 48   | A     | 1   | 0.44                    | 0.00                           | 0.19                 |
| 49   | A     | 0   | 0.15                    | 0.00                           | 0.27                 |
| 52   | A     | 1   | 0.38                    | 0.00                           | 0.27                 |
| 55   | A     | 0   | 0.24                    | 0.00                           | 0.34                 |
| 59   | A     | 1   | 0.08                    | 0.00                           | -0.05                |
| 62   | A     | 1   | 2.42                    | 0.00                           | -0.53                |
| 66   | A     | 1   | 0.92                    | 0.00                           | 0.54                 |
| 67   | A     | 1   | 0.37                    | 0.00                           | -0.66                |
| 70   | A     | 1   | 0.78                    | 0.00                           | 0.57                 |
| 73   | A     | 0   | -0.04                   | 0.00                           | -0.74                |
| 76   | A     | 1   | -0.25                   | 0.00                           | -0.11                |
| 77   | A     | 1   | 0.12                    | 0.00                           | 0.21                 |
| 80   | A     | 1   | 1.14                    | 0.00                           | -0.35                |
| 81   | A     | 0   | 0.01                    | 0.00                           | -0.10                |
| 82   | A     | 0   | 0.04                    | 0.00                           | -0.01                |

|     |   |   |       |      |       |
|-----|---|---|-------|------|-------|
| 90  | A | 1 | 0.74  | 0.00 | -0.04 |
| 92  | A | 0 | 0.00  | 0.00 | -0.55 |
| 94  | A | 1 | 0.09  | 0.00 | 0.31  |
| 95  | A | 1 | 0.86  | 0.00 | -0.15 |
| 96  | A | 1 | 2.71  | 0.00 | -0.59 |
| 97  | A | 1 | 0.51  | 0.00 | -0.46 |
| 106 | A | 1 | 0.52  | 0.00 | -0.83 |
| 108 | A | 0 | -0.10 | 0.00 | 2.07  |
| 124 | A | 0 | -0.01 | 0.00 | -0.18 |
| 127 | A | 1 | -0.01 | 0.00 | -1.03 |
| 755 | C | 1 | 0.96  | 0.00 | 0.56  |
| 758 | C | 1 | 0.50  | 0.00 | 0.16  |
| 760 | C | 1 | -0.03 | 0.00 | 2.17  |
| 790 | C | 0 | -0.03 | 0.00 | -0.43 |
| 791 | C | 0 | 0.01  | 0.00 | 3.36  |
| 794 | C | 0 | 0.39  | 0.00 | 0.36  |
| 830 | C | 1 | 0.11  | 0.00 | 0.73  |
| 878 | C | 0 | 0.09  | 0.00 | -1.02 |
| 883 | C | 1 | 0.62  | 0.00 | -0.33 |
| 884 | C | 1 | 0.60  | 0.00 | -0.86 |
| 886 | C | 1 | 1.30  | 0.00 | -0.64 |
| 887 | C | 1 | 0.55  | 0.00 | -0.62 |
| 888 | C | 0 | -0.04 | 0.00 | -0.19 |
| 889 | C | 0 | 1.79  | 0.00 | -0.22 |
| 892 | C | 0 | 0.00  | 0.00 | -0.38 |
| 893 | C | 1 | 0.11  | 0.00 | -0.64 |
| 894 | C | 0 | -0.03 | 0.00 | -0.79 |
| 439 | B | 0 | 0.00  | 0.00 | 0.04  |
| 440 | B | 1 | 0.48  | 0.00 | -0.13 |

|     |   |   |       |      |       |
|-----|---|---|-------|------|-------|
| 443 | B | 0 | -0.04 | 0.00 | -0.31 |
| 445 | B | 1 | 0.08  | 0.00 | -0.32 |
| 446 | B | 1 | 1.59  | 0.00 | -0.30 |
| 447 | B | 0 | 0.00  | 0.00 | -0.37 |
| 449 | B | 1 | 2.13  | 0.00 | -0.27 |
| 450 | B | 1 | 2.44  | 0.00 | -0.42 |
| 451 | B | 1 | 1.46  | 0.00 | -0.86 |
